# Supplementary material for: EHR2Vec: Representation Learning of Medical Concepts From Temporal Patterns of Clinical Notes Based on Self-Attention Mechanism
Source: Front Genet. 2020 Jun 29;11:630. doi: 10.3389/fgene.2020.00630 (PMC7344186; doi:10.3389/fgene.2020.00630)
Supplement: Supplementary file 1 [file Data_Sheet_1.xlsx]

## Sheet: Supp. Table 1
Hospital	No. of EMRs	No. of patients
Renji Hospital	9955	2947
West China Hospital Sichuan University	7693	1678
Xiangya Hospital	6815	2416
Tongji Hospital of HUST	5754	1725
Nanjing Drum Tower Hospital	4850	1428
The Second Affiliated Hospital of Medical School of Zhejiang University	4234	1331
Jiangsu Provincial People's Hospital	3537	1231
The First Hospital of China Medical University	3363	1119
Shanghai Changhai Hospital	2932	450
Peking University Shenzhen Hospital	2900	915
Shanghai Changzheng Hospital	1982	204
The Second Hospital of Dalian Medical University	1891	347
The First Affiliated Hospital of Medical School of Zhejiang University	1461	474
Total	57367	14439

## Sheet: Supp. Table 2
Item	# number
No. of patients	14219
No. of medical events	26583
No. of duplicate-removed medical entities (eall)	10469
Medication	963
Lab Test	35
Symptom	8365
Diagnosis	1106

## Sheet: Supp. Table 3
Diagnosis
	Word2Vec		Med2Vec		EHR2Vec
Rank	Correlation	Diagnosis	Correlation	Diagnosis	Correlation	Diagnosis
1	0.8	Hypertension	0.29	Chronic viral hepatitis B	0.92	SLE
2	0.8	Diabetes	0.27	Typhoid	0.82	Hypertension
3	0.79	Hyperlipemia	0.27	Fever of unknown origin	0.77	Abortion
4	0.78	Hypothyroidism	0.26	Renal hypertension	0.76	Pregnancy
5	0.75	Fatty liver	0.24	Hypertensive disorder complicating pregnancy	0.7	Lung infection
6	0.75	Hypertension grade 2	0.24	Nephritis	0.6	Sjogren syndrome
7	0.74	Osteoporosis	0.24	Hyperlipemia	0.59	Osteoporosis
8	0.74	· Infection of the upper respiratory tract	0.24	Pneumonedema	0.58	Stillbirth
9	0.74	Hyperuricemia	0.23	Scapulohumeral periarthritis	0.57	Diabetes
10	0.73	Rheumatism	0.23	Hypocalcemia	0.51	Connective tissue diseases
11	0.73	Anticardiolipin antibody syndrome	0.22	Gastroesophageal reflux disease	0.5	LE
12	0.72	· Urinary tract infection	0.22	Erythema	0.49	Premature birth
13	0.72	· Penicillin anaphylaxis	0.22	Cardiac function grade 3	0.49	Venereal disease
14	0.72	Gallstone	0.22	Malaria	0.48	Rheumatoid arthritis
15	0.71	Hypokalemia	0.21	Multiple sclerosis	0.46	Psychosis
16	0.71	Lupus encephalopathy	0.21	Agalactia	0.44	Gallstone
17	0.71	Sjogren syndrome	0.21	Right renal cysts	0.43	Nephropathy
18	0.71	Interstitial pneumonia	0.2	Acute infection of the upper respiratory tract	0.42	Thyroid nodule
19	0.7	Hypertension grade 3	0.2	Hematological system involvement	0.42	infection of the upper respiratory tract
20	0.7	Type 2 diabetes mellitus	0.2	Cerebral arterial insufficiency	0.42	Hyperthyroidism

## Sheet: Supp. Table 4
Symptom
	Word2Vec		Med2Vec		EHR2Vec
Rank	Correlation	Symptom	Correlation	Symptom	Correlation	Symptom
1	0.36	Left lower quadrant pain	0.4	Little bubbles in urine	0.79	Pericardial effusion
2	0.34	Bi-fingers and upper extremities more red rash	0.36	Edema subside	0.77	Fever
3	0.27	Facial edema subside	0.35	Both lower extremities and Mucosa/skin edema	0.75	Cough
4	0.24	Multiple joint and lower extremity pain	0.34	Blowing murmur	0.66	Chest tightness
5	0.24	Slight headache	0.31	Distension of the neck venous	0.65	Rash
6	0.23	Recurrent rash	0.31	Lung dullness	0.62	Extremities and backbone tenderness
7	0.22	Red rashes on the soles of both fee	0.31	Thickened main pulmonary artery	0.62	Edema
8	0.22	Both hands and mucosa/skin rash	0.31	Edema aggravating	0.62	Both lower extremities mild edema
9	0.22	Left lower lung inflation	0.3	Spleen cyst	0.61	Haemorrhage
10	0.21	Dizziness	0.3	Red macula	0.6	Both lower extremities edema
11	0.21	Gallbladder enlargement	0.29	Abdominal shifting dullness	0.6	Splenomegaly
12	0.21	The abdomen bulged as if it were the size of the first trimester	0.28	Lower extremities pitting edema	0.6	Facial erythema
13	0.2	Erythema are scattered in the cheeks	0.28	Gastric fundus erosion	0.59	Bilateral pleural effusion
14	0.2	Supraclavicular lymphadenectasis	0.28	Erythema ease	0.58	Feeble
15	0.2	Lower extremities edema aggravating	0.28	Double joint and knee slight tumidness	0.58	Hemorrhage
16	0.2	Pelvic lumps	0.28	Abdominal distension relief	0.58	Anhelation
17	0.2	Both hands morning stiffness	0.27	Little exudate	0.56	Expectoration
18	0.19	Epilation	0.27	Chill	0.56	Palpitation
19	0.19	Left lower lung consolidation	0.27	Bilateral joint and proximal interphalangeal joint pain	0.55	Pleural effusion
20	0.18	Slightly swollen fingers on both hands	0.27	System erythema fade	0.52	Abdominal bulge

## Sheet: Supp. Table 5
Lab Test
	Word2Vec		Med2Vec		EHR2vec
Rank	Correlation	Lab Test	Correlation	Lab Test	Correlation	Lab Test
1	-0.29	Complement 4-B	0.16	Urine protein qualitative test-U	0.91	Anti-nuclear antibody (ANA)-B
2	-0.33	Anti-SSA-B	0.14	Urine protein/creatinine-U	0.9	Complement 3-B
3	-0.33	Anti-nuclear antibody (ANA)-B	0.11	Glomerular filtration rate (eGFR)-B	0.87	Complement 4-B
4	-0.34	Anti-RNP antibody-B	0.08	Anti-dsDNA antibody-B	0.86	Platelet (PLT)-B
5	-0.35	Urine protein qualitative test-U	0.07	Creatinine (CREA)-B	0.84	Urine protein qualitative test-U
6	-0.37	Anti-SSB-B	0.07	Complement 3-B	0.82	Anti-SSA-B
7	-0.37	(IgA)Anticardiolipin antibody (ACA)-B	0.04	Anti-beta-2-glycoprotein 1 antibody-B	0.8	Hemoglobin-B
8	-0.38	Anti-Sm antibody-B	0.04	Cylindruria-U	0.78	Anti-dsDNA antibody-B
9	-0.39	Complement 3-B	0.03	Anti-SSA-B	0.71	Anti-Sm antibody-B
10	-0.39	Urine protein/creatinine-U	0.01	(IgA)Anticardiolipin antibody (ACA)-B	0.66	Anti-RNP antibody-B
11	-0.39	Creatinine (CREA)-B	0.01	Anti-SSB-B	0.63	Rheumatoid factor test (quantitative)-B
12	-0.4	Creatinine (CREA)-B	0	Anti-Sm antibody-B	0.58	Creatinine (CREA)-B
13	-0.4	Cylindruria-U	0	Lupus anticoagulant normalized ratio-B	0.57	Anti-SSB-B
14	-0.41	Rheumatoid factor test (quantitative)-B	-0.02	Anticardiolipin antibody -B	0.57	Lymphocyte-B
15	-0.42	Anti-dsDNA antibody-B	-0.02	Hemoglobin-B	0.37	Anticardiolipin antibody-B
16	-0.43	Anti-beta-2-glycoprotein 1 antibody-B	-0.04	Complement 4-B	0.34	Glomerular filtration rate (eGFR)-B
17	-0.44	Hemoglobin-B	-0.05	Anti-nuclear antibody (ANA)-B	0.34	(IgM)Anticardiolipin antibody (ACA)-B
18	-0.45	Anticardiolipin antibody-B	-0.05	Anti-RNP antibody-B	0.32	Anti-beta-2-glycoprotein 1 antibody-B
19	-0.47	Lupus anticoagulant normalized ratio-B	-0.07	Rheumatoid factor test (quantitative)-B	0.31	(IgG)Anticardiolipin antibody (ACA)-B
20	-0.52	Platelet (PLT)-B	-0.07	Lymphocyte-B	0.3	Urine protein/creatinine-U

## Sheet: Supp. Table 6
PID	visit	Specific entity in visit
0154a1f00da8f70e9c2e3fbcc61910a8	visit1	[Diagnosis] SLE	[Symptoms] Repeated edema of both lower extremities	[Symptom] Facial erythema	[Symptom] Edema of both feet	[Symptom] foamy urine	[Symptom] eyelid swelling	[Symptoms] swelling of extremities	[Symptoms] Two fingersand erythema	[Symptoms] Double nail weekand hand erythema	[Symptoms] Increased facial erythema	[Lab Test] Urine protein qualitative test-urine	[Lab Test] Anti-SSA-blood	[Lab Test] Anti-nuclear antibody (ANA) -blood	[Lab Test] Hemoglobin-blood	[Lab Test] Complement C3-blood	[Lab Test] Urine protein qualitative test-urine	[Lab Test] Anti-SSA-blood	[Lab Test] Anti-nuclear antibody (ANA) -blood	[Lab Test] Hemoglobin-blood
0154a1f00da8f70e9c2e3fbcc61910a8	visit2	[Diagnosis] SLE	[Diagnosis] LN	[Diagnosis] Hypoproteinemia	[Diagnosis] Hypertension	[Diagnosis] Diabetes	[Diagnosis] Hepatitis	[Medication] Methylprednisolone sodium succinate for injection	[Medication] Methylprednisolone sodium succinate for injection	[Medication] Hydroxychloroquine sulfate tablets	[Medication] Hepatitis B human immunoglobulin	[Medication] BCG injection	[Medication] polio vaccine	[Medication] measles vaccine	[Medication] Adsorption of cell-free Baibaibai combined vaccine		[Medication] Hydroxychloroquine sulfate tablets	[Medication] Cyclophosphamide	[Symptoms] Increased facial erythema	[Symptom] eyelid swelling	[Symptoms] swelling of extremities	[Symptoms] facial swelling	[Symptoms] Two fingersand erythema	[Symptoms] Double nail weekand hand erythema	[Symptoms] intermittent fever	[Symptom] Cough	[Symptom] Obvious sputum	[Symptoms] chills	[Lab Test] Urine protein qualitative test-urine	[Lab Test] Anti-SSA-blood	[Lab Test] Anti-nuclear antibody (ANA) -blood	[Lab Test] Complement C3-blood	[Lab Test] Complement C4-blood	[Lab Test] Urine protein qualitative test-urine	[Lab Test] Anti-SSA-blood	[Lab Test] Anti-nuclear antibody (ANA) -blood	[Lab Test] Hemoglobin-blood	[Lab Test] Complement C3-blood	[Lab Test] Complement C4-blood	[Lab Test] Urine protein qualitative test-urine	[Lab Test] Anti-RNP antibody-blood	[Lab Test] Anti-SSA-blood	[Lab Test] Anti-dsDNA antibody-blood	[Lab Test] Anticardiolipin antibody determination-blood	[Lab Test] Anti-nuclear antibody (ANA) -blood	[Lab Test] Creatinine determination (CREA) -blood	[Lab Test] Hemoglobin-blood	[Lab Test] Complement C3-blood	[Lab Test] Complement C4-blood
0154a1f00da8f70e9c2e3fbcc61910a8	visit3	[Diagnosis] Hepatitis	[Diagnosis] tuberculosis	[Diagnosis] infectious disease	[Diagnosis] SLE	[Diagnosis] LN	[Diagnosis] Renal hypertension	[Diagnosis] Lupus mesenteric vasculitis	[Diagnosis] SLE	[Diagnosis] LN	[Diagnosis] Renal hypertension	[Diagnosis] Lupus mesenteric vasculitis	[Medication] Cyclophosphamide	[Medication] Metoclopramide tablets	[Medication] Ondansetron Hydrochloride	[Medication] Trimebutine maleate tablets	[Medication] Mosapride citrate tablets	[Medication] Prednisone acetate tablets	[Medication] Prednisone acetate tablets	[Medication] Hydroxychloroquine sulfate tablets	[Medication] Cyclophosphamide	[Symptoms] deformity of extremities	[Symptoms] Mildand depressed edema of both lower limbsand jointsand spine or limbs	[Symptoms] Paralysis of limbsand nervous system	[Symptoms] Scattered faceand a small amount of erythema	[Symptoms] Superficial lymph nodesand enlarged body	[Symptom] murmur in each valve area	[Symptoms] total abdominal tenderness	[Symptoms] total abdominal rebound pain	[Symptom] abdominal mass	[Symptoms] Mildand depressed edema of both lower extremities	[Symptom] Both lower extremities edema	[Lab Test] Urine protein qualitative test-urine	[Lab Test] Urine protein qualitative test-urine	[Lab Test] Anti-RNP antibody-blood	[Lab Test] Anti-SSA-blood	[Lab Test] Anti-dsDNA antibody-blood	[Lab Test] Anticardiolipin antibody determination-blood	[Lab Test] Anti-nuclear antibody (ANA) -blood	[Lab Test] Creatinine determination (CREA) -blood	[Lab Test] Hemoglobin-blood	[Lab Test] Complement C3-blood	[Lab Test] Complement C4-blood
0154a1f00da8f70e9c2e3fbcc61910a8	visit4	[Diagnosis] LN	[Diagnosis] Renal hypertension	[Diagnosis] Lupus mesenteric vasculitis	[Diagnosis] SLE	[Diagnosis] LN	[Diagnosis] Renal hypertension	[Diagnosis] Lupus mesenteric vasculitis	[Diagnosis] Hepatitis	[Diagnosis] tuberculosis	[Medication] Cyclophosphamide	[Medication] Metoclopramide tablets	[Medication] Ondansetron Hydrochloride	[Medication] Trimebutine maleate tablets	[Medication] Mosapride citrate tablets	[Medication] Prednisone acetate tablets	[Medication] Prednisone acetate tablets	[Medication] Hydroxychloroquine sulfate tablets	[Medication] Cyclophosphamide	[Medication] Prednisone acetate injection	[Medication] Hydroxychloroquine sulfate tablets	[Medication] Cyclophosphamide	[Medication] calcium carbonate D3 tablets	[Medication] Alfacalcidol capsules	[Medication] Valsartan tablets	[Medication] Atorvastatin calcium tablets	[Medication] aspirin tablets	[Symptom] Both lower extremities edema	[Symptom] Facial erythema	[Symptom] Fever	[Symptom] intestinal obstruction	[Symptom] pelvic effusion	[Symptom] Abdominal wall swelling	[Symptom] Left pleural effusion	[Symptom] Nausea	[Symptom] Vomit	[Symptom] Foam urine improves	[Lab Test] Complement C3-blood
0154a1f00da8f70e9c2e3fbcc61910a8	visit5	[Diagnosis] SLE	[Diagnosis] LN	[Diagnosis] Renal hypertension	[Diagnosis] Lupus mesenteric vasculitis	[Diagnosis] Hepatitis	[Diagnosis] tuberculosis	[Diagnosis] infectious disease	[Diagnosis] SLE	[Diagnosis] LN	[Diagnosis] Renal hypertension	[Diagnosis] Lupus mesenteric vasculitis	[Diagnosis] Hyperlipidemia	[Medication] Metoclopramide tablets	[Medication] Ondansetron Hydrochloride	[Medication] Trimebutine maleate tablets	[Medication] Mosapride citrate tablets	[Medication] Prednisone acetate tablets	[Medication] Hydroxychloroquine sulfate tablets	[Medication] Cyclophosphamide	[Medication] Prednisone acetate injection	[Medication] Hydroxychloroquine sulfate tablets	[Medication] Cyclophosphamide	[Medication] Prednisone acetate injection	[Medication] Hydroxychloroquine sulfate tablets	[Symptom] intestinal obstruction	[Symptom] pelvic effusion	[Symptom] Abdominal wall swelling	[Symptom] Left pleural effusion	[Symptom] Nausea	[Symptom] Vomit	[Symptom] Foam urine improves	[Symptoms] abdominal pain	[Symptoms] abdominal distension	[Symptoms] facial edema	[Symptom] Feeble	[Symptom] dizziness	[Symptoms] dysmenorrhea	[Symptom] Mucosa / skin full moon face	[Lab Test] Urine protein qualitative test-urine	[Lab Test] Platelet count (PLT) -blood
0154a1f00da8f70e9c2e3fbcc61910a8	visit6	[Diagnosis] Shingles	[Diagnosis] Shingles	[Diagnosis] SLE	[Diagnosis] LN	[Diagnosis] Renal hypertension	[Diagnosis] Lupus mesenteric vasculitis	[Diagnosis] Hyperlipidemia	[Diagnosis] Onychomycosis	[Diagnosis] SLE	[Diagnosis] LN	[Diagnosis] Renal hypertension	[Diagnosis] Lupus mesenteric vasculitis	[Diagnosis] Hepatitis	[Medication] Metoclopramide tablets	[Medication] Ondansetron Hydrochloride	[Medication] Trimebutine maleate tablets	[Medication] Mosapride citrate tablets	[Medication] Cyclophosphamide	[Medication] Hepatitis B human immunoglobulin	[Medication] BCG injection	[Medication] polio vaccine	[Medication] measles vaccine	[Medication] Adsorption of cell-free Baibaibai combined vaccine	[Medication] JE vaccine	[Medication] Prednisone acetate injection	[Medication] Hydroxychloroquine sulfate tablets	[Medication] Cyclophosphamide	[Medication] Cyclophosphamide	[Medication] Cyclophosphamide	[Symptom] The right upper limb clusters erythema	[Symptom] Right upper limb blisters	[Symptoms] Itchy right upper limb	[Symptom] Burning sensation in the right upper limb	[Symptom] The right upper limb clusters erythema	[Symptom] Right upper limb blisters	[Symptoms] Itchy right upper limb	[Symptom] Burning sensation in the right upper limb	[Symptom] shingles	[Symptom] intestinal obstruction	[Symptom] pelvic effusion	[Symptom] Abdominal wall swelling	[Symptom] Left pleural effusion	[Symptom] Nausea	[Symptom] Vomit	[Symptoms] dysmenorrhea	[Symptom] Mucosa / skin full moon face	[Symptoms] Rightand Stretching Armand Upper Limband Mucosa / Old Skin Rash	[Symptoms] Right hand backand upper limbsand mucous membrane / skin rash
0154a1f00da8f70e9c2e3fbcc61910a8	visit7	[Diagnosis] Hepatitis	[Diagnosis] tuberculosis	[Diagnosis] infectious disease	[Diagnosis] Pregnancy	[Diagnosis] Abortion NOS	[Diagnosis] Premature birth	[Diagnosis] Stillbirth	[Diagnosis] SLE	[Diagnosis] LN	[Diagnosis] Renal hypertension	[Diagnosis] Lupus mesenteric vasculitis	[Medication] Prednisone acetate tablets	[Medication] Hydroxychloroquine sulfate tablets	[Medication] Valsartan tablets	[Medication] Cyclophosphamide	[Medication] Hepatitis B human immunoglobulin	[Medication] BCG injection	[Medication] polio vaccine	[Medication] measles vaccine	[Medication] Adsorption of cell-free Baibaibai combined vaccine	[Medication] JE vaccine	[Medication] Prednisone acetate injection	[Medication] Hydroxychloroquine sulfate tablets	[Medication] Cyclophosphamide	[Medication] Prednisone acetate injection	[Medication] Hydroxychloroquine sulfate tablets	[Symptoms] dysmenorrhea	[Symptom] Mucosa / skin full moon face	[Symptoms] Right hand backand upper limbsand mucous membrane / skin rash	[Symptoms] Rightand Stretching Armand Upper Limband Mucosa / Old Skin Rash	[Symptoms] Rightand extended armand upper limband mucosa / skin swellingand rash	[Symptoms] Right hand backand upper limbsand mucous membrane / skin rednessand rash	[Symptoms] Mucous membrane / skin exudateand rash	[Symptoms] Subcutaneousand Skinand Whole Body Bleeding	[Symptoms] Mucosal / skin edema	[Symptoms] Mucosa / Skin Liver Palm	[Symptoms] Mucosa / skin spider nevus	[Symptoms] Superficial lymph nodesand whole bodyand lymphadenopathy	[Symptoms] headand head deformity	[Symptom] Bilateral scleraand eyesand head yellow staining	[Symptoms] mastoidand earand head tenderness	[Symptoms] Paranasal sinusand noseand head tenderness	[Symptoms] Tonsilsand Throatand Head Enlargement	[Symptom] Thyroidand neck enlargement	[Symptoms] Thyroidand neck tenderness	[Symptoms] Thyroidand neck vascular murmur	[Symptoms] pleuraland lung friction	[Symptoms] Apical heartand abnormal heart bulge
0154a1f00da8f70e9c2e3fbcc61910a8	visit8	[Diagnosis] Hyperlipidemia	[Diagnosis] Onychomycosis	[Diagnosis] Hepatitis	[Diagnosis] tuberculosis	[Diagnosis] infectious disease	[Diagnosis] Pregnancy	[Diagnosis] Abortion NOS	[Diagnosis] Premature birth	[Diagnosis] Stillbirth	[Diagnosis] SLE	[Diagnosis] LN	[Diagnosis] Renal hypertension	[Diagnosis] Lupus mesenteric vasculitis	[Diagnosis] Hyperlipidemia	[Diagnosis] Onychomycosis	[Medication] Cyclophosphamide	[Medication] Cyclophosphamide	[Medication] Cyclophosphamide	[Medication] Cyclophosphamide	[Medication] Prednisone acetate injection	[Medication] Hydroxychloroquine sulfate tablets	[Medication] Valsartan tablets	[Medication] Aspirin enteric-coated tablets	[Medication] Atorvastatin calcium tablets	[Medication] Alfacalcidol capsules	[Medication] Calcium carbonate D3 tablets	[Medication] Diammonium glycyrrhizinate enteric-coated capsules	[Medication] Lansoprazole	[Medication] Prednisone acetate injection	[Medication] Hydroxychloroquine sulfate tablets	[Medication] Valsartan tablets	[Medication] Atorvastatin calcium tablets	[Medication] aspirin tablets	[Medication] Cyclophosphamide	[Medication] Prednisone acetate tablets	[Medication] Hydroxychloroquine sulfate tablets	[Medication] Valsartan tablets	[Medication] Hepatitis B human immunoglobulin	[Medication] BCG injection	[Medication] polio vaccine	[Medication] measles vaccine	[Medication] Adsorption of cell-free Baibaibai combined vaccine	[Medication] JE vaccine	[Medication] Prednisone acetate injection	[Medication] Hydroxychloroquine sulfate tablets	[Symptom] Mucosa / skin full moon face	[Symptoms] Right hand backand upper limbsand mucous membrane / skin rash	[Symptoms] Rightand Stretching Armand Upper Limband Mucosa / Old Skin Rash
0f8845dfeafc1134ad4918d3fd443542	visit1	[Diagnosis] Rheumatism	[Diagnosis] Rheumatism	[Diagnosis] Hepatitis	[Diagnosis] tuberculosis	[Diagnosis] infectious disease	[Symptoms] swelling and pain in multiple joints	[Symptom] Bilateral jointand ankle swelling	[Symptoms] Bilateral jointand ankle pain	[Symptoms] Multi-jointand systemic pain	[Symptom] Hair loss	[Symptoms] Multi-jointand systemic light allergy	[Symptoms] oral ulcers	[Symptom] morning stiffness	[Symptom] oral rash	[Symptoms] Pain relief	[Symptoms] Multi-jointand systemic light allergy	[Symptoms] oral ulcers	[Symptom] morning stiffness	[Symptom] oral rash	[Symptoms] Pain relief
0f8845dfeafc1134ad4918d3fd443542	visit2	[Diagnosis] SLE	[Diagnosis] LN	[Diagnosis] Sjogren syndrome	[Diagnosis] Lung infection	[Diagnosis] Facial herpes simplex	[Diagnosis] SLE	[Diagnosis] LN	[Diagnosis] Sjogren syndrome	[Diagnosis] Lung infection	[Diagnosis] Facial herpes simplex	[Symptom] Facial erythema	[Symptoms] Bilateral zygomatic erythema	[Symptom] Facial erythema	[Symptoms] slight itching	[Symptom] Hair loss	[Symptoms] oral ulcers	[Symptom] morning stiffness	[Symptom] Joint deformity	[Symptom] Renault sign of joint	[Lab Test] Urine protein qualitative test-urine	[Lab Test] Anti-SSA-blood	[Lab Test] Anti-dsDNA antibody-blood	[Lab Test] Anticardiolipin antibody determination-blood	[Lab Test] Anti-nuclear antibody (ANA) -blood	[Lab Test] Cast-urine	[Lab Test] Rheumatoid factor RF test (quantitative)-blood	[Lab Test] Complement C3-blood	[Lab Test] Complement C4-blood	[Lab Test] Urine protein qualitative test-urine	[Lab Test] Anti-SSA-blood	[Lab Test] Anti-dsDNA antibody-blood	[Lab Test] Anticardiolipin antibody determination-blood	[Lab Test] Anti-nuclear antibody (ANA) -blood	[Lab Test] Cast-urine	[Lab Test]Rheumatoid factor RF test (quantitative)-blood	[Lab Test] Complement C3-blood	[Lab Test] Complement C4-blood	[Medication] Cyclophosphamide	[Medication] Cyclophosphamide
0f8845dfeafc1134ad4918d3fd443542	visit3	[Diagnosis] Hepatitis	[Diagnosis] tuberculosis	[Diagnosis] infectious disease	[Diagnosis] Pregnancy	[Diagnosis] Abortion NOS	[Diagnosis] Premature birth	[Diagnosis] Stillbirth	[Diagnosis] SLE	[Diagnosis] LN	[Diagnosis] Sjogren syndrome	[Diagnosis] SLE	[Diagnosis] LN	[Diagnosis] Sjogren syndrome	[Diagnosis] SLE	[Diagnosis] LN	[Diagnosis] Sjogren syndrome	[Medication] Cyclophosphamide	[Medication] Cyclophosphamide	[Medication] Cyclophosphamide	[Medication] Methylprednisolone sodium succinate for injection	[Medication] aspirin tablets	[Medication] Cefmetazole Sodium for Injection	[Medication] Cyclophosphamide	[Medication] Prednisone acetate injection	[Medication] Prednisone acetate injection	[Medication] Hydroxychloroquine sulfate tablets	[Medication] Alfacalcidol capsules	[Symptom] Hair loss	[Symptom] Facial erythema	[Symptoms] Light allergy	[Symptom] Headache	[Symptoms] oral ulcers	[Symptom] Joint swelling and pain	[Symptoms] dysmenorrhea	[Symptom] Facial erythema	[Symptoms] Cheeksand mucous membrane / skin with a little erythemaand rash	[Symptoms] Subcutaneousand Skinand Whole Body Bleeding	[Symptoms] Mucosal / skin edema	[Symptoms] Mucosa / Skin Liver Palm	[Symptoms] Mucosa / skin spider nevus	[Symptoms] Superficial lymph nodesand whole bodyand lymphadenopathy	[Symptoms] headand head deformity	[Symptom] Bilateral scleraand eyesand head yellow staining	[Symptoms] mastoidand earand head tenderness	[Lab Test] Anti-dsDNA antibody-blood	[Lab Test] Anti-nuclear antibody (ANA) -blood	[Lab Test] Complement C4-blood
1af8df9a1133499a4ab5c13ed3e5938f	visit1	[Diagnosis] Pregnancy	[Diagnosis] SLE	[Diagnosis] LN	[Diagnosis] Pregnancy	[Diagnosis] SLE	[Diagnosis] LN	[Medication] Prednisone acetate injection	[Medication] leigongteng tablets	[Medication] Prednisone acetate injection	[Medication] leigongteng tablets	[Symptoms] urine protein	[Symptoms] urine protein	[Symptoms] Review urine protein	[Symptoms] Pain in both jointsand knees	[Symptoms] Pain in both jointsand metacarpophalangeal joints	[Symptom] Facial erythema	[Symptoms] oral ulcers	[Symptom] Hair loss	[Lab Test] Urine protein qualitative test-urine	[Lab Test] Anticardiolipin antibody determination-blood	[Lab Test] Anti-nuclear antibody (ANA) -blood	[Lab Test]] Complement C4-blood
1af8df9a1133499a4ab5c13ed3e5938f	visit2	[Diagnosis] SLE	[Diagnosis] Thrombocytopenic purpura	[Diagnosis] Hypertension	[Diagnosis] Diabetes	[Diagnosis] Coronary atherosclerotic heart disease	[Diagnosis] Hepatitis	[Diagnosis] Tuberculosis	[Diagnosis] infectious disease	[Diagnosis] Drug and food allergies	[Diagnosis] Venereal disease	[Diagnosis] infectious disease	[Diagnosis] SLE	[Diagnosis] LN	[Diagnosis] Immune thrombocytopenic purpura	[Diagnosis] Osteoporosis	[Diagnosis] SLE	[Medication] Methylprednisolone sodium succinate for injection	[Medication] intravenous injection of human immunoglobulin	[Medication] Methylprednisolone sodium succinate for injection	[Medication] intravenous injection of human immunoglobulin	[Medication] Methylprednisolone sodium succinate for injection	[Medication] intravenous injection of human immunoglobulin	[Medication] cyclosporine capsules	[Medication] Meloxicam	[Medication] Prednisone acetate tablets	[Medication] Prednisone acetate tablets	[Medication] cyclosporine capsules	[Medication] Alfacalcidol capsules	[Medication] potassium chloride sustained-release tablets	[Symptom] Fever	[Symptoms] chills	[Symptom] chills	[Symptom] Feeble	[Symptom] Anorexia	[Symptoms] new rash	[Symptom] Hair loss	[Symptoms] oral ulcers	[Symptom] Raynaud's sign	[Symptom] Cough	[Symptom] Expectoration	[Symptoms] hemoptysis	[Symptom] Hematemesis	[Symptoms] looseness	[Symptoms] obvious pain in the left hip	[Symptoms] soft tissue edema	[Symptoms] gluteal muscle edema	[Symptom] Fever	[Symptoms] chills
1af8df9a1133499a4ab5c13ed3e5938f	visit3	[Diagnosis] SLE	[Diagnosis] Hypertension	[Diagnosis] Diabetes	[Diagnosis] Coronary atherosclerotic heart disease	[Diagnosis] Hepatitis	[Diagnosis] Tuberculosis	[Diagnosis] infectious disease	[Diagnosis] Drug and food allergies	[Diagnosis] Venereal disease	[Diagnosis] infectious disease	[Diagnosis] SLE	[Diagnosis] LN	[Diagnosis] Immune thrombocytopenic purpura	[Diagnosis] SLE	[Medication] Cyclosporine	[Medication] Prednisone	[Medication] Cyclosporine	[Medication] Prednisone acetate tablets	[Medication] Prednisone acetate tablets	[Medication] Cyclosporine	[Medication] Cyclosporine	[Medication] Calcitriol capsule	[Medication] Sheng platelet capsule	[Medication] Sheng platelet capsule	[Medication] Omeprazole enteric capsules	[Medication] Omeprazole enteric capsules	[Symptom] Petechiae	[Symptoms] Double skinand petechiae	[Symptoms] bleeding gums	[Symptoms] low fever	[Symptoms] night sweats	[Symptom] Petechiae	[Symptoms] Double skinand petechiae	[Symptoms] bleeding gums	[Symptoms] low fever	[Symptoms] night sweats	[Symptoms] Mucosaand skinand erythema	[Symptoms] Mucous membraneand skinand yellow staining	[Symptom] liver palm	[Lab Test] Platelet count (PLT) -blood	[Lab Test] Complement C4-blood	[Lab Test] Anti-SSA-blood	[Lab Test] Anti-dsDNA antibody-blood	[Lab Test] Anti-nuclear antibody (ANA) -blood	[Lab Test] Lymphocyte count-blood	[Lab Test] Platelet count (PLT) -blood	[Lab Test] Complement C3-blood	[Lab Test] Platelet count (PLT) -blood
[truncated: 20 more columns]

## Sheet: Supp Table 7
Dimension 360	Dimension 457	Dimension 440
[Diagnosis] Subcutaneous bleeding	[Medication] pelvic fracture	[Diagnosis] Serious pulmonary hypertension
[Symptom] Joint pain gradually worsens	[Symptom] Repeated facial weakness	[Symptom] Pain in both joints and knees
[Medication] Voriconazole	[Symptom] Ureter cyst	[Symptom] Exophthalmos
[Medication] Aluminum magnesium carbonate tablets	[Symptom] left anterior fascicular block	[Symptom] Intestinal wall and ilea edema
[Symptom] Facial rash	[Symptom] Skin and Torso fish scales Rash	[Symptom] Vasculitis-like rash on both fingers
[Symptom] Erythema flaky on palms of both hands	[Symptom] Butterfly rash on the face	[Symptom] Limb stiffness
[Symptom] Near pleura and two lung adhesions	[Symptom] Red maculopapular and rash	[Diagnosis] Asthma
[Symptom] Facial butterfly and obvious erythema	[Symptom] Double/multiple joints/hand swelling and pain	[Symptom] Skin fever
[Symptom] Atrophy of double attachments	[Symptom] Repeated mouth ulcers	[Symptom] Nail red and congestive rash
[Diagnosis] Oral ulcer with infection	[Medication] biapenem	[Symptom] scattered erythema in elbows
